# Supplementary material for: Molecular malaria surveillance using a novel protocol for extraction and analysis of nucleic acids retained on used rapid diagnostic tests
Source: PubMed Central journal article supplement (PMC7378824; doi:10.1038/s41598-020-69268-5), 2020-07-23

## **Extraction of Nucleic Acids from RDTs (ENAR): step-by-step protocol**

This is a detailed protocol describing the procedures for extraction of nucleic acids from malaria rapid diagnostic tests (RDTs) as evaluated in the publication:

**Molecular malaria surveillance using a novel protocol for extraction and analysis of nucleic acids retained on used rapid diagnostic tests.**

The extraction procedure was adapted from:

*Zainabadi K et al. A novel method for extracting nucleic acids from dried blood spots for ultrasensitive detection of low-density Plasmodium falciparum and Plasmodium vivax infections. Malar J. 2017;16(1):377.*

They provide an excellent and very detailed instruction on the preparation of the extraction buffer which should be followed.

## **IDENTIFICATION, SORTING AND TRACKING OF RDTs**

The *RDTselect* app is a browser-based application which identifies barcode-labelled RDTs based on an input list containing all barcodes of a certain group. A single barcode can be scanned at a time with a mobile phone camera. The application identifies which group the sorted RDT belongs to.

The source code of the *RDTselect* app can be found at: <https://github.com/Sparclex/barcode-value-finder>

The *RDTallocator* app enables tracking of an individual RDT throughout the extraction process. The barcode is scanned with a mobile phone camera and the application allocates the associated RDT strip to the next available position in a 12-channel reservoir and subsequently 96-well plate.

The source code of the *RDTselect* app can be found at: <https://github.com/Sparclex/position-allocator>

## REAGENTS AND MATERIALS

**Table 1: Consumables**

| Article name                                                  | Supplier                 | Cat. number    |
|---------------------------------------------------------------|--------------------------|----------------|
| 12-channel multi-well reservoir                               | Axygen, Corning Inc, USA | RES-MW12-HP-SI |
| 96-well collection plate                                      | Omega bio-tec, Inc, USA  | EZ9602-02      |
| E-Z 96 DNA plate                                              | Omega bio-tec, Inc, USA  | BD96           |
| DNA LoBind 96-well plate                                      | Eppendorf AG, Germany    | 0030 603.303   |
| Sterile, filtered pipette tips with volume range of 50-1200ul | various suppliers        |                |

**Table 2: Chemicals/Reagents**

NB: if available, all chemicals and reagents should be designated as “Molecular Biology Reagents” and suitable for molecular biology applications.

| Article name                                                         | Company                            | Cat number    |
|----------------------------------------------------------------------|------------------------------------|---------------|
| DNA Elution Buffer                                                   | Zymo Research, USA                 | D3004-4-50    |
| Ethanol                                                              | Sigma-Aldrich Chemie GmbH, Germany | 51976-500ML-F |
| 2-Propanol                                                           | Sigma-Aldrich Chemie GmbH, Germany | I9516-500ML   |
| Molecular biology grade H <sub>2</sub> O                             | Sigma-Aldrich Chemie GmbH, Germany | W4502-1L      |
| Trizma hydrochloride buffer solution (pH 7.4)                        | Sigma-Aldrich Chemie GmbH, Germany | 9313-1L       |
| Guanine thiocyanate                                                  | Sigma-Aldrich Chemie GmbH, Germany | 50981-500G    |
| Triton X-100                                                         | Sigma-Aldrich Chemie GmbH, Germany | T8787-50ML    |
| Sodium chloride                                                      | Sigma-Aldrich Chemie GmbH, Germany | S3014-500G    |
| Hydrochloric acid, 6N                                                | VWR Life Science, USA              | E484-500ML    |
| Ethylenediaminetetraacetic acid disodium salt solution (EDTA), 0.5 M | Sigma-Aldrich Chemie GmbH, Germany | E7889-100ML   |
| 2-Mercaptoethanol                                                    | Sigma-Aldrich Chemie GmbH, Germany | 63689-100ML-F |

**Table 3: Equipment**

| Article name                                                        | Company          | Reference number |
|---------------------------------------------------------------------|------------------|------------------|
| Centrifuge for 96-well plates                                       | -                |                  |
| Multichannel pipets for volume range of 50-1200ul                   | Gilson/Eppendorf | PM14156/H41766H  |
| Incubator (60 °C) with enough space for a rocking platform          | -                |                  |
| Rocking Platform/ lab shaker for 96-well plates (tolerating 60 °C). | -                |                  |

## PREPARATION OF EXTRACTION BUFFERS

### Lysis buffer / Wash 1 buffer

NB: Lysis buffer and Wash 1 are identical, with the exception that before use 0.5% 2-mercaptoethanol is added to the lysis buffer.

1. Add ~500 mL of water to a sterile 1 L bottle
2. Add all reagents as described in the table below:

| Concentrations used for lysis/wash 1 buffer       | Amount for 1L of lysis/wash 1 buffer               |
|---------------------------------------------------|----------------------------------------------------|
| 3M Guanidine thiocyanate                          | 355 g Guanidine thiocyanate                        |
| 16.7% 2-Propanol                                  | 167 mL 2-Propanol                                  |
| 2% Triton X-100                                   | 20 mL Triton X-100                                 |
| 10mM EDTA                                         | 20 mL 0.5 M EDTA solution                          |
| 5mM Trizma hydrochloride buffer solution (pH 7.4) | 5 mL Trizma hydrochloride buffer solution (pH 7.4) |
| 0.1% Hydrochloric acid                            | 1 mL 6M Hydrochloric acid                          |

3. Shake until completely dissolved
4. Add up to 1000 mL with mol. biol. grade H<sub>2</sub>O
5. Transfer 500 mL to a new bottle and label it with "Wash 1".
6. Before use, 0.5 mL 2-mercaptoethanol is added to 100 mL lysis buffer.

## Wash 2 buffer

1. Add all reagents to a sterile 1L bottle as described in the table below

| Concentrations used for wash 2 buffer | Amount for 1L of wash 2 buffer                      |
|---------------------------------------|-----------------------------------------------------|
| 25% Ethanol                           | 250 mL Ethanol                                      |
| 25% 2-Propanol                        | 250 mL 2-Propanol                                   |
| 100mM Sodium chloride                 | 20 mL 5M Sodium chloride solution                   |
| 10mM Trizma HCl pH 7.4                | 10 mL Trizma hydrochloride buffer solution (pH 7.4) |

2. Shake until completely dissolved
3. Add up to 1000 mL with mol. biol. grade H<sub>2</sub>O

## OPENING RDT CASSETTE AND REMOVING RDT STRIP

1. Open the RDT cassette, remove the RDT strip using sterile single-use forceps and transfer the strip into a 12-channel multi-well reservoir. Up to 96 RDT strips can be processed at the same time, using eight 12-channel reservoirs.
2. Add one positive control (RDT with known parasitemia, e.g. 5  $\mu\text{L}$  blood with parasite density of 200 Pf/ $\mu\text{L}$ ) and one negative control (lysis buffer only) to each extraction batch as controls.

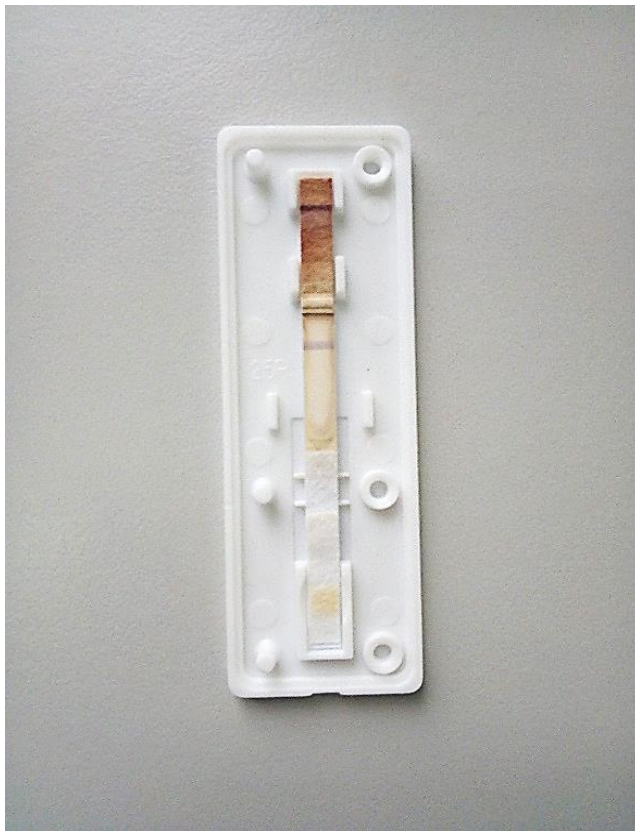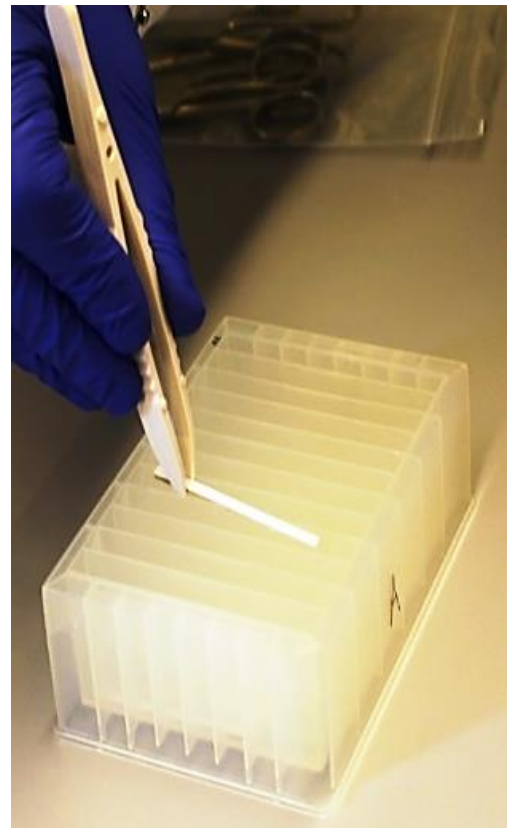

## EXTRACTION OF NUCLEIC ACIDS FROM RDT STRIPS

1. Add **900 µL of Lysis Buffer** to each channel of the reservoir using a multichannel pipette. Make sure all RDT strips are completely submerged in the lysis buffer. Seal the reservoir with an adhesive aluminium foil.
2. Incubate the reservoirs **for 2 hours at 60 °C and shaking at 120 RPM.**
3. Secure an Omega E-Z 96 DNA plate (96 wells) to a 96-well collection plate with a tape.
4. Tilt the reservoir and transfer 900 µL of the supernatant (lysate) from the 12-channel reservoir to the E-Z 96 DNA Plate sitting on top of a 96-well collection plate.
5. Centrifuge the E-Z 96 DNA Plate (on top of the 96-well collection plate) at **3,500 RPM (2260 g) for 2 minutes.**
6. Discard the flow through and reuse the same 96-well collection plate.
7. Add **500µL of Wash 1** to the DNA plate and centrifuge at **3,500 RPM (2260 g) for 2 minutes**
8. Discard the flow through and reuse the same 96-well collection plate.
9. Add **500µL of Wash 2** to the DNA plate and centrifuge at **3,500 RPM (2260 g) for 3 minutes**
10. Discard the flow through and reuse the same 96-well collection plate.
11. Centrifuge the empty DNA plate at **3,500 RPM (2260 g) for 3 minutes** to completely dry the silica.
12. Place the E-Z DNA plate on top of a DNA LoBind 96-well plate for elution of nucleic acids.
13. Add **50µL** of pre-warmed (**60 °C**) Elution buffer to each well of the E-Z DNA plate to elute the nucleic acids.
14. Incubate the E-Z DNA plate at room temperature for **5 minutes.**
15. Centrifuge the E-Z DNA plate **3,500 RPM (2260 g) for 3 minutes.**
16. Add an additional **25µL** of pre-warmed (60 °C) Elution buffer to each well of the E-Z DNA plate to elute the nucleic acids.



17. Incubate the E-Z DNA plate at room temperature for **5 minutes**.
18. Centrifuge the E-Z DNA plate **3,500 RPM (2260 g) for 3 minutes**.
19. Discard the E-Z DNA Plate and seal the DNA LoBind 96-well plate containing the eluted nucleic acids using aluminum foil.
20. Store the DNA LoBind 96-well plate containing the nucleic acids at **-20 °C or -80 °C**.

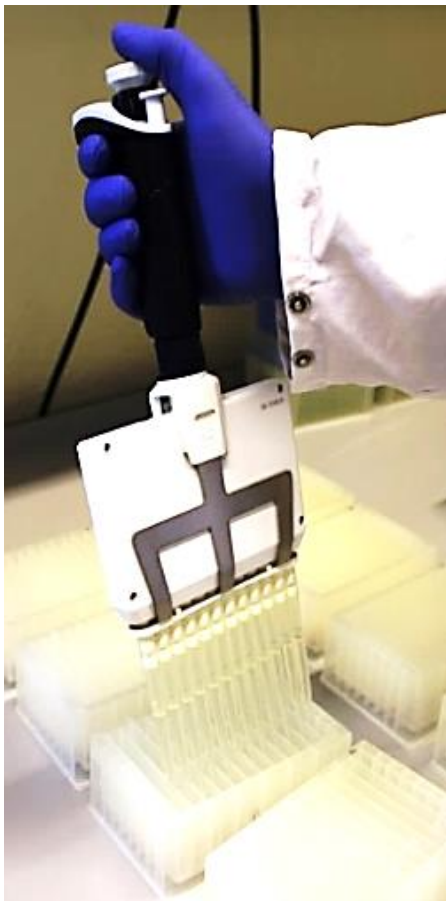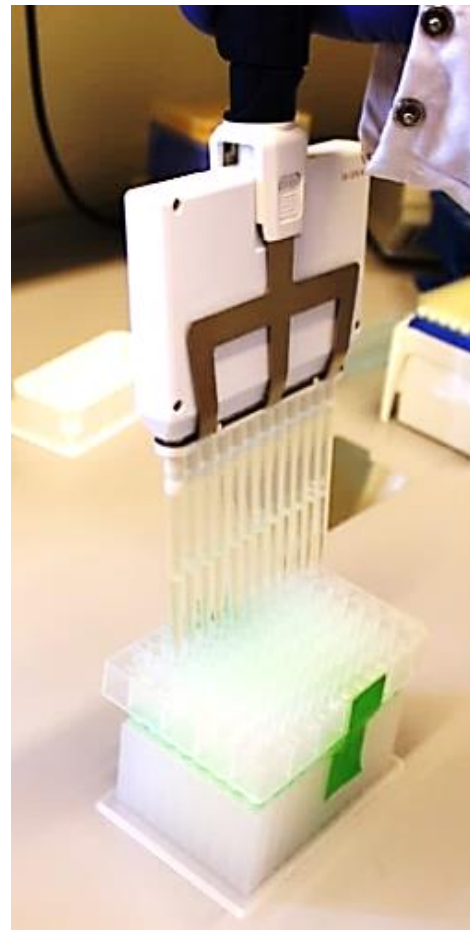

Supplement: 41598_2020_69268_MOESM3_ESM.pdf [file 41598_2020_69268_MOESM3_ESM.pdf]
