# Supplementary material for: Molecular malaria surveillance using a novel protocol for extraction and analysis of nucleic acids retained on used rapid diagnostic tests
Source: PubMed Central journal article supplement (PMC7378824; doi:10.1038/s41598-020-69268-5), 2020-07-23
Supplement: 41598_2020_69268_MOESM2_ESM.pdf [file 41598_2020_69268_MOESM2_ESM.pdf]

# **Molecular malaria surveillance using a novel protocol for extraction and analysis of nucleic acids retained on used rapid diagnostic tests**

Etienne A. Guirou <sup>a,b,¶</sup>, Tobias Schindler <sup>a,b,¶,\*</sup>, Salome Hosch <sup>a,b</sup>, Olivier Tresor Donfack <sup>c</sup>, Charlene Aya Yoboue <sup>a,b</sup>, Silvan Krähenbühl <sup>a,b</sup>, Anna Deal <sup>a,b</sup>, Glenda Cosi <sup>a,b</sup>, Linda Gondwe <sup>a,b,d</sup>, Grace Mwangoka <sup>d</sup>, Heavenlight Masuki <sup>e</sup>, Nahya Salim <sup>e</sup>, Maxmillian Mpina <sup>a,b,d</sup>, Jongo Said <sup>d</sup>, Salim Abdulla <sup>d</sup>, Stephen L. Hoffman <sup>f</sup>, Bonifacio Manguire Nlavo <sup>g</sup>, Carl Maas <sup>g</sup>, Carlos Cortes Falla <sup>c</sup>, Wonder P. Phiri <sup>c</sup>, Guillermo A. Garcia <sup>c</sup>, Marcel Tanner <sup>a,b</sup> and Claudia Daubenberger <sup>a,b,\*</sup>

<sup>a</sup> Department of Medical Parasitology and Infection Biology, Swiss Tropical and Public Health Institute, Basel, Switzerland

<sup>b</sup> University of Basel, Basel, Switzerland

<sup>c</sup> Medical Care Development International, Malabo, Equatorial Guinea

<sup>d</sup> Ifakara Health Institute, Bagamoyo Branch, United Republic of Tanzania

<sup>e</sup> Department of Paediatrics and Child Health, Muhimbili University of Health and Allied Sciences, Dar Es Salaam, Tanzania

<sup>f</sup> Sanaria Inc., Rockville, Maryland, USA

<sup>g</sup> Marathon EG Production Ltd, Malabo, Equatorial Guinea

¶ These authors contributed equally to this work.

\* Corresponding authors: tobias.schindler@swisstph.ch, claudia.daubenberger@swisstph.ch

**Supplementary Figure S2. Detection of the gametocyte-specific transcript PF3D7\_0630000 in blood on RDTs after three weeks of storage at RT.**

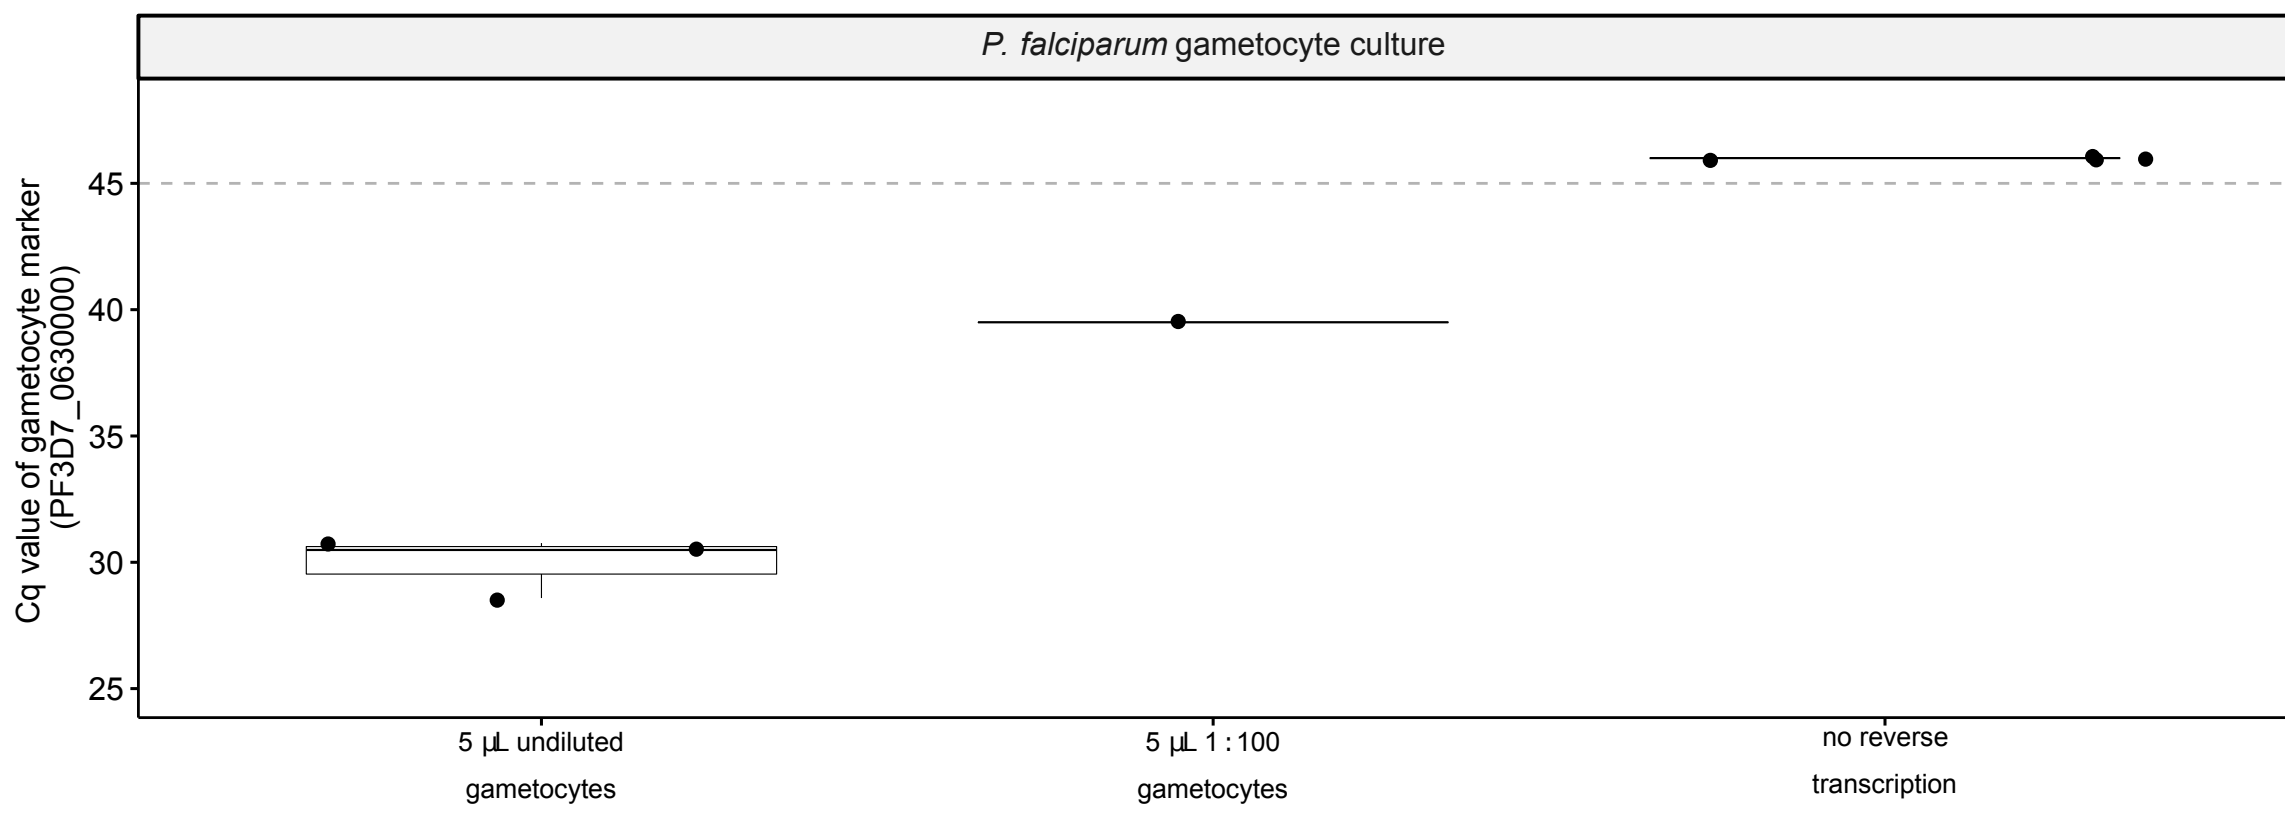

Extracted NA from 5 µL undiluted and 1:100 diluted culture amplified specifically the gametocyte marker, while the control without reverse transcription step did not result in amplification.
